# Supplementary material for: Postbiotics Prepared Using Lactobacillus paracasei CCFM1224 Prevent Nonalcoholic Fatty Liver Disease by Modulating the Gut Microbiota and Liver Metabolism
Source: MDPI journal article supplement (doi:10.3390/ijms232113522), 2022-11-04

**Supplementary Table S1.** Grading system for NAFLD

| Histological feature              | Score |         |         |      |
|-----------------------------------|-------|---------|---------|------|
|                                   | 0     | 1       | 2       | 3    |
| Steatosis:                        | <5%   | 5-33%   | 33-66%  | >66% |
| Macrovesicular steatosis          | <5%   | 5-33%   | 33-66%  | >66% |
| Microvesicular steatosis          | <5%   | 5-33%   | 33-66%  | >66% |
| Hypertrophy                       | <5%   | 5-33%   | 33-66%  | >66% |
| Inflammation:                     |       |         |         |      |
| Number of inflammatory foci/field | <0.5  | 0.5-1.0 | 1.0-2.0 | >2.0 |

**Supplementary Table S2.** Mobile phase elution gradient

| Time (min) | Flow rate (mL/min) | A (%) | B (%) |
|------------|--------------------|-------|-------|
| 0          | 0.4                | 100   | 0     |
| 3.5        | 0.4                | 75.5  | 24.5  |
| 5          | 0.4                | 35    | 65    |
| 5.5        | 0.4                | 0     | 100   |
| 7.4        | 0.6                | 0     | 100   |
| 7.6        | 0.6                | 48.5  | 51.5  |
| 7.8        | 0.5                | 100   | 0     |
| 9          | 0.4                | 100   | 0     |
| 10         | 0.4                | 100   | 0     |

**Supplementary Table S3.** Mass spectrometry parameters

| Description                      | Parameters |
|----------------------------------|------------|
| Scan type (m/z)                  | 70-1050    |
| Sheath gas flow rate (arb)       | 50         |
| Aux gas flow rate (arb)          | 13         |
| Heater temp (°C)                 | 425        |
| Capillary temp (°C)              | 325        |
| Spray voltage (+) (V)            | 3500       |
| Spray voltage (-) (V)            | -3500      |
| S-Lens RF Level                  | 50         |
| Normalized collision energy (eV) | 20,40,60   |
| Resolution (Full MS)             | 60000      |
| Resolution (MS2)                 | 7500       |

**Supplementary Table S4.** Primer sequences for quantitative real-time PCR of hepatic genes involved in lipid metabolism

| Primers        | Forward Sequences (5'→3') | Reverse Sequences (5'→3') |
|----------------|---------------------------|---------------------------|
| PPAR- $\gamma$ | TCGCTGATGCACTGCCTATG      | GAGAGGTCCACAGAGCTGATT     |
| SREBP-1c       | TGACCCGGCTATTCCGTGA       | CTGGGCTGAGCAATACAGTTC     |
| FASN           | GGAGGTGGTGATAGCCGGTAT     | TGGGTAATCCATAGAGCCCAG     |
| ATGL           | GGATGGCGGCATTTCAGACA      | CAAAGGGTTGGGTTGGTTCAG     |
| HSL            | CCAGCCTGAGGGCTTACTG       | CTCCATTGACTGTGACATCTCG    |
| PPAR- $\alpha$ | AGAGCCCCATCTGTCCTCTC      | ACTGGTAGTCTGCAAAACCAAA    |
| CD36           | ATGGGCTGTGATCGGAAGT       | GTCTTCCCAATAAGCATGTCTCC   |
| FATP5          | CTACGCTGGCTGCATATAGATG    | CCACAAAGGTCTCTGGAGGAT     |

**Supplementary Figure S1.** Alpha diversity indices of gut microbiota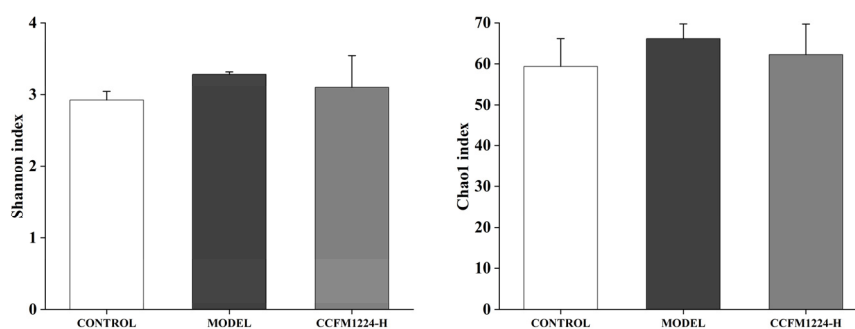

Supplement: s1 [file s1]
